# Supplementary material
Source: PubMed Central journal article supplement (PMC3124792)
Supplement: 97320630006237S1.pdf [file 97320630006237S1.pdf]

## Supplementary material:

**Table 1:** Likelihood parameter estimates for synaptic weights

| Predictor      |                          | Parameter Estimates |        | Output Layer |
|----------------|--------------------------|---------------------|--------|--------------|
|                |                          | H(1:1)              | H(1:2) | treatment    |
| Input Layer    | (Bias)                   | -0.36               | 0.43   |              |
|                | [age_cat=.00]            | -0.26               | -0.28  |              |
|                | [age_cat=1.00]           | 0.28                | 0.57   |              |
|                | [viral_load=.00]         | -1.77               | -0.51  |              |
|                | [viral_load=1.00]        | 1.64                | 0.97   |              |
|                | [gender=0]               | 0.38                | 0.04   |              |
|                | [gender=1]               | -0.58               | -0.44  |              |
|                | [Area=1 ]                | 0.10                | 0.65   |              |
|                | [Area=2 ]                | 0.20                | -0.76  |              |
|                | [Area=3 ]                | -0.88               | -1.05  |              |
|                | [Area=4 ]                | 1.60                | 1.18   |              |
|                | Treatment duration Visit | 3.74                | 0.93   |              |
|                |                          | -1.65               | -1.32  |              |
| Hidden Layer 1 | (Bias)                   |                     |        | 0.884305     |
|                | H(1:1)                   |                     |        | -4.37528     |
|                | H(1:2)                   |                     |        | -2.01677     |
